# Supplementary figures and images for: Corrosion Protection Mechanism Study of Nitrite Modified CaAl-LDH in Epoxy Coatings
Source: Preprints.org preprint supplement (doi:10.20944/preprints202306.0495.v1), 2023-06-07

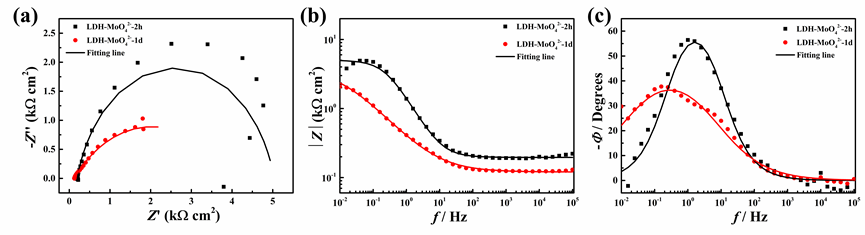


Fig.S1 The EIS results of carbon steel in 0.02 M NaCl solution with 5g/L LDH-MoO42-.

Supplement: Supplementary file 2 [file supplementary]
